# Supplementary material
Source: PubMed Central journal article supplement (PMC1388097)
Supplement: nar_34_4_1261__5.pdf [file nar_34_4_1261__5.pdf]

**Supporting Table 1.** Functional over-representation of genes in three clusters discovered by SSC in *C. elegans* (worm) time course microarray data\* .

| Cluster   | GO Description                         | Fraction | P-value  | Corrected P |
|-----------|----------------------------------------|----------|----------|-------------|
| <b>6A</b> | growth                                 | 165/565  | 5.23E-53 | 1.64E-50    |
|           | development                            | 216/565  | 1.47E-48 | 4.60E-46    |
|           | larval development (sensu Nematoda)    | 112/565  | 7.19E-40 | 2.25E-37    |
|           | positive regulation of growth rate     | 111/565  | 3.81E-34 | 1.19E-31    |
|           | metabolism                             | 213/565  | 1.03E-29 | 3.21E-27    |
|           | reproduction                           | 98/565   | 1.83E-29 | 5.74E-27    |
| <b>6B</b> | locomotory behavior                    | 17/67    | 2.02E-09 | 2.34E-07    |
|           | regulation of growth                   | 16/67    | 2.82E-06 | 0.000327    |
|           | cuticle biosynthesis (sensu Nematoda)  | 3/67     | 5.50E-05 | 0.006384    |
|           | amine biosynthesis                     | 3/67     | 0.00011  | 0.012709    |
|           | visual perception                      | 2/67     | 1.38E-04 | 0.015981    |
|           | aging                                  | 4/67     | 0.00019  | 0.022013    |
| <b>6C</b> | embryonic development (sensu Animalia) | 86/420   | 4.41E-16 | 1.04E-13    |
|           | cell cycle                             | 16/420   | 5.51E-05 | 0.012948    |
|           | cell proliferation                     | 17/420   | 6.99E-05 | 0.016436    |
|           | DNA replication and chromosome cycle   | 12/420   | 0.000291 | 0.068376    |
|           | female gamete generation               | 2/420    | 0.005269 | 1.000000    |
|           | gametogenesis                          | 20/420   | 0.007783 | 1.000000    |

Supporting Table 1. Gene function over-representation in 4 clusters discovered by SSC of worm microarray data\* corresponding to Fig. 6A-C in the main text. See Supporting Table 3 for over-representation results for all 16 clusters.

\* Jiang, M., Ryu, J., Kiraly, M., Duke, K., Reinke, V., & Kim, S. K. (2001) *Proc. Natl. Acad. Sci. USA* **98**, 218-23.
