# Supplementary material
Source: PubMed Central journal article supplement (PMC1388097)

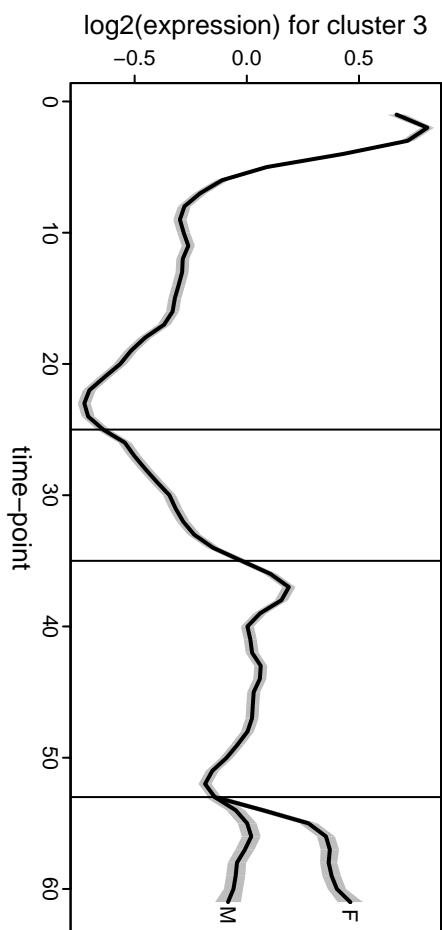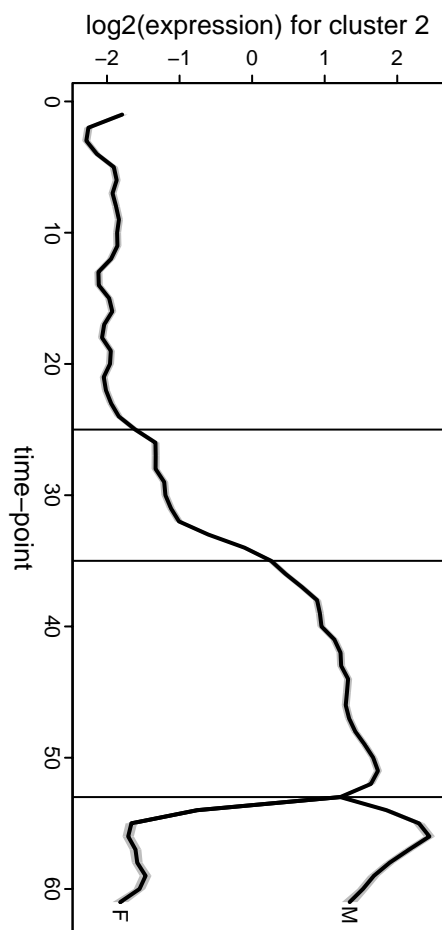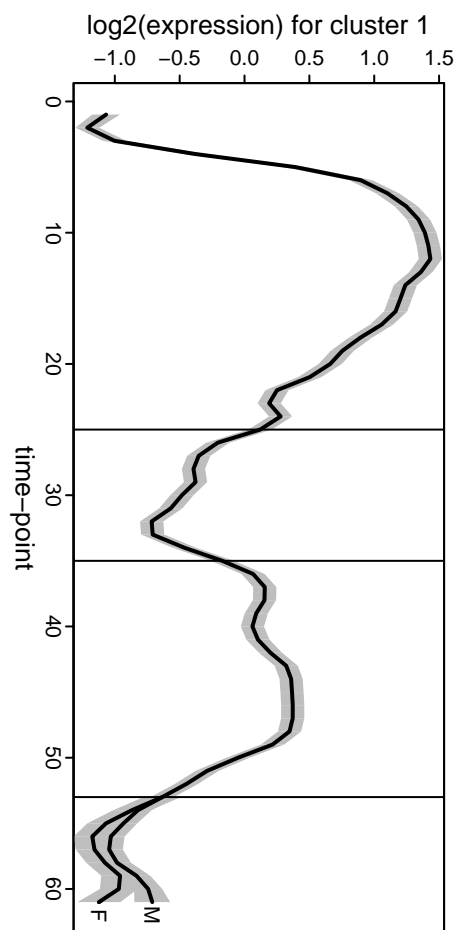

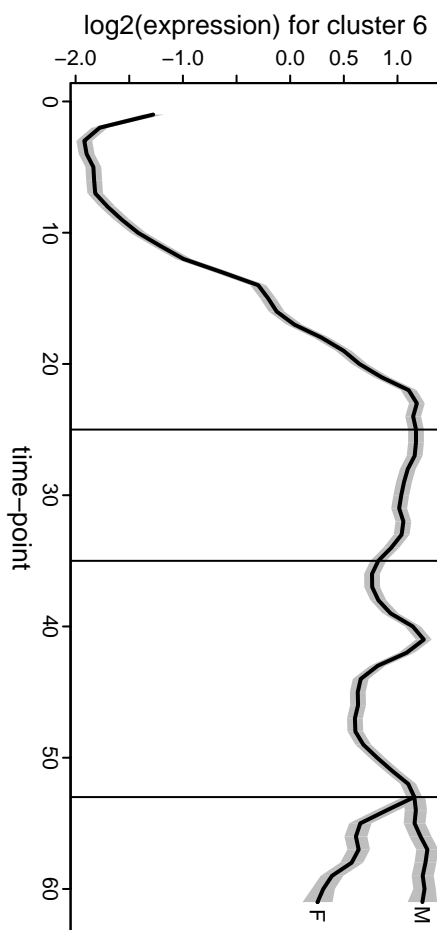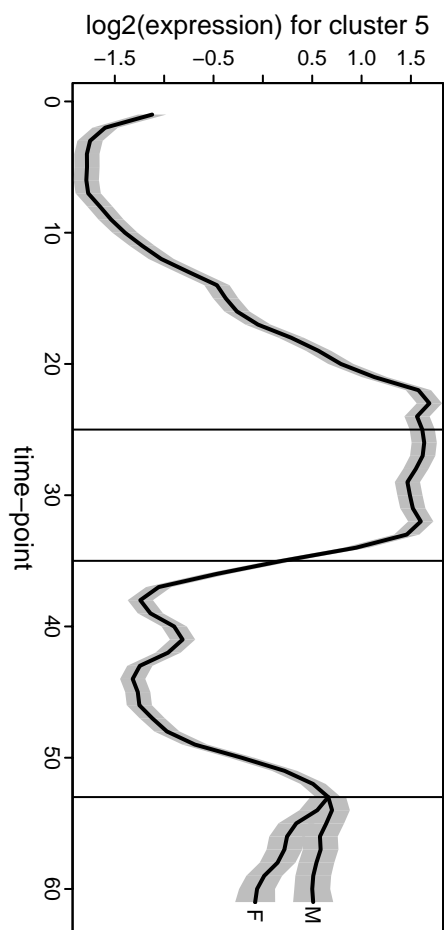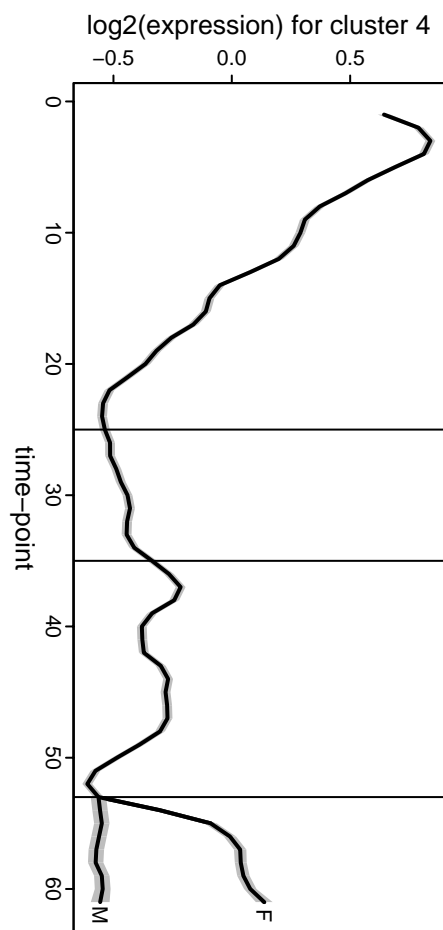

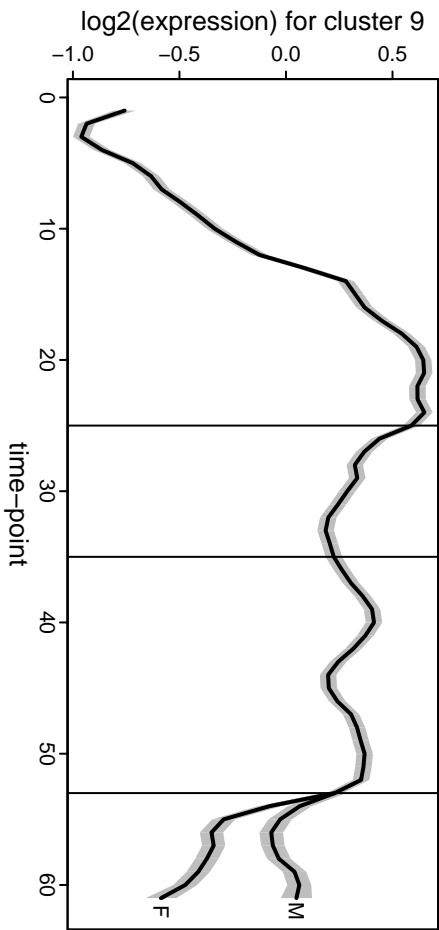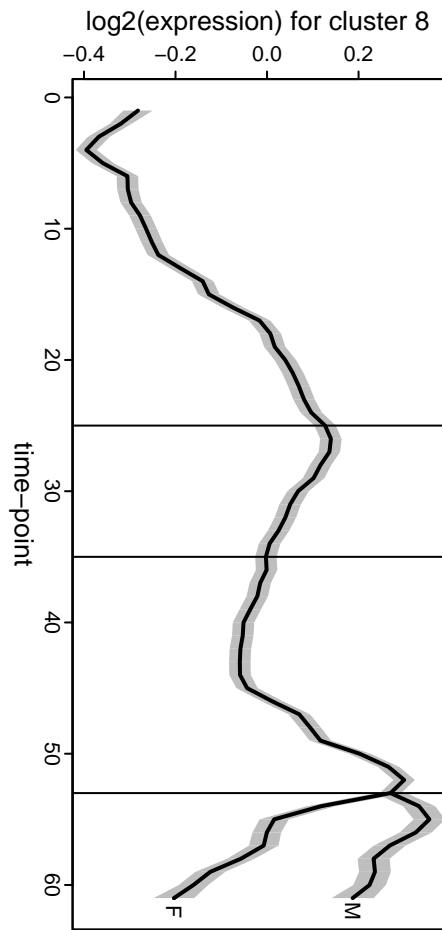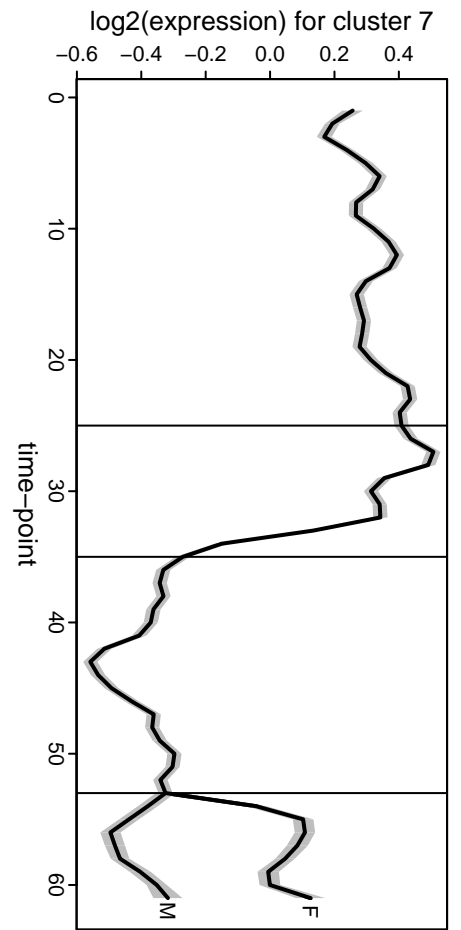

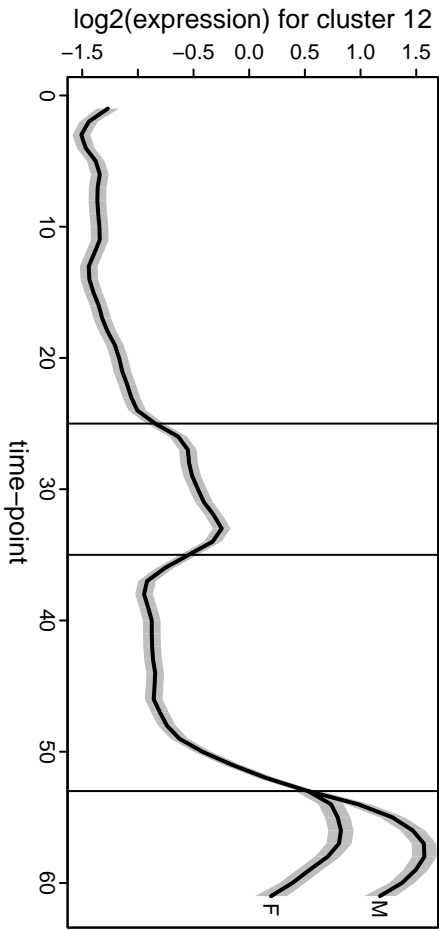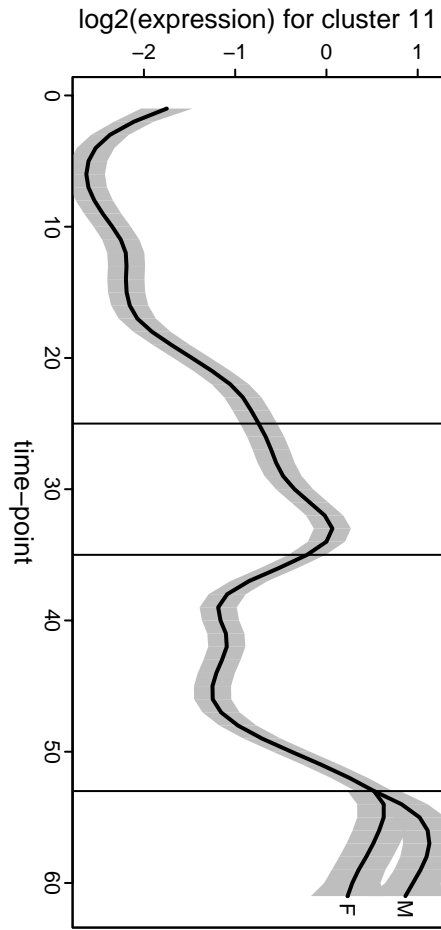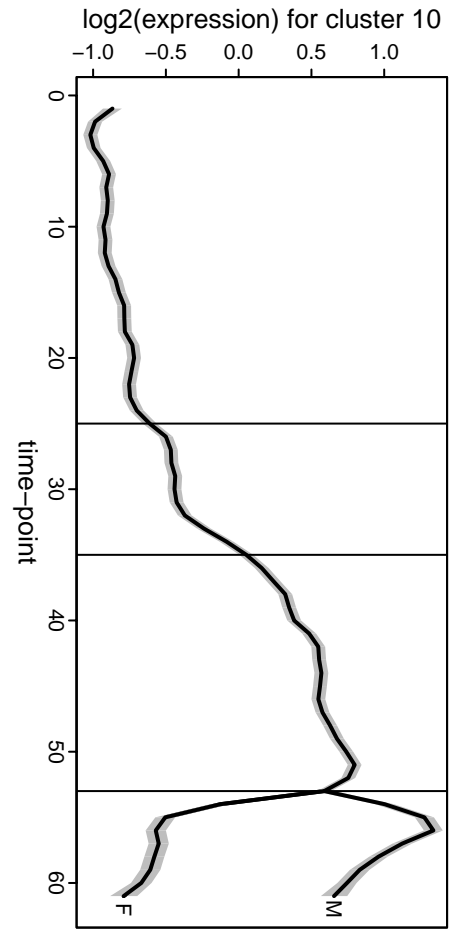

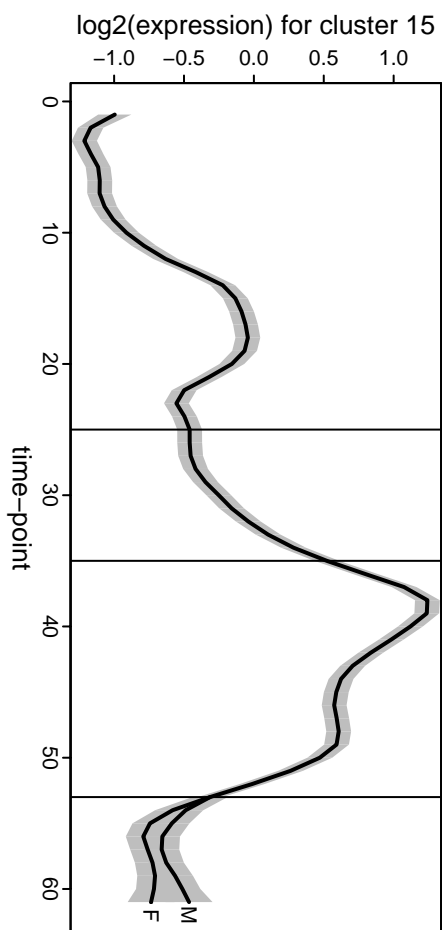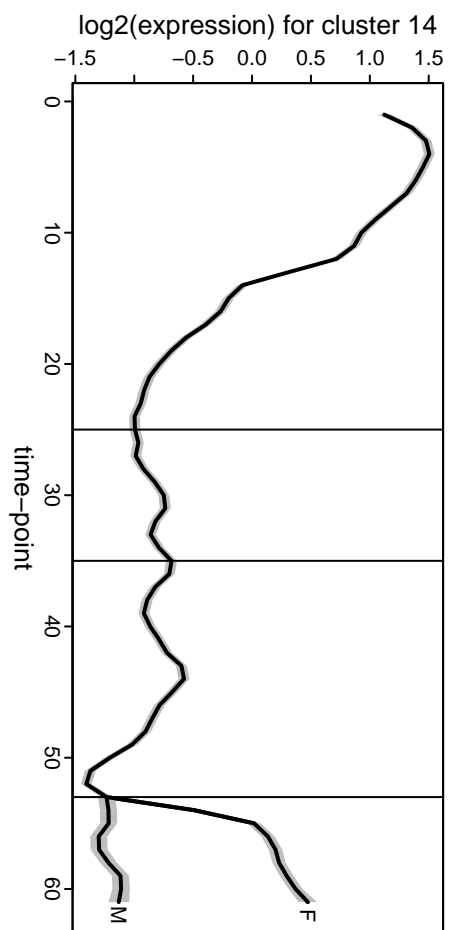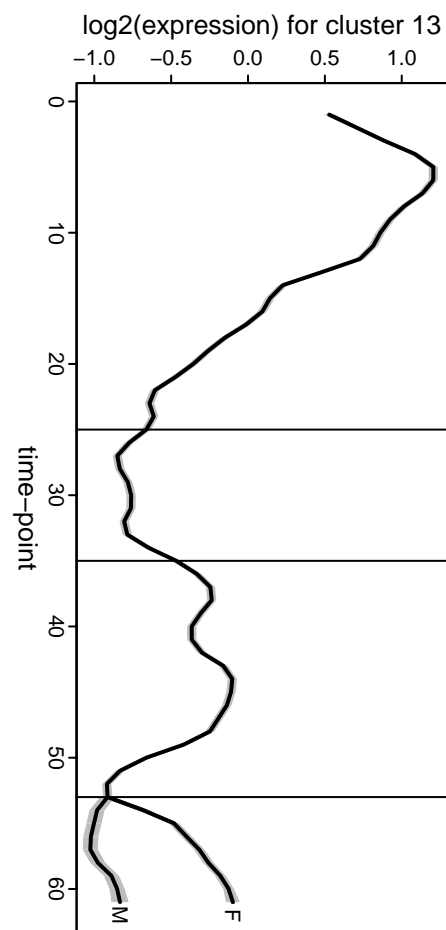

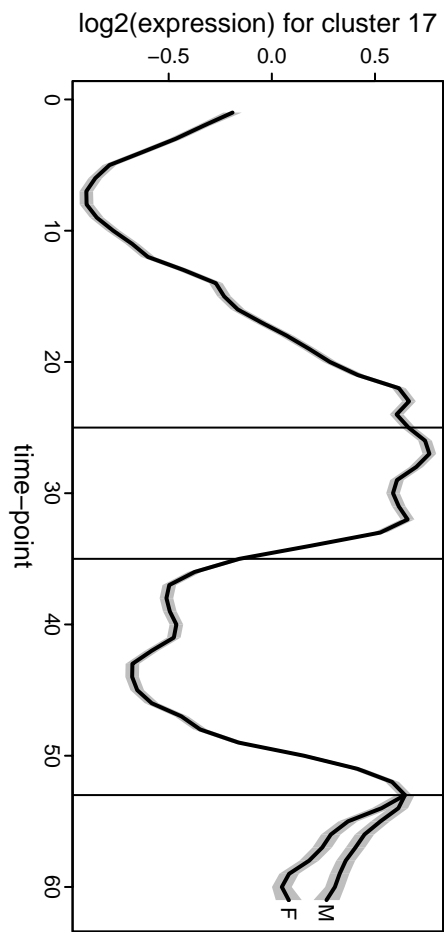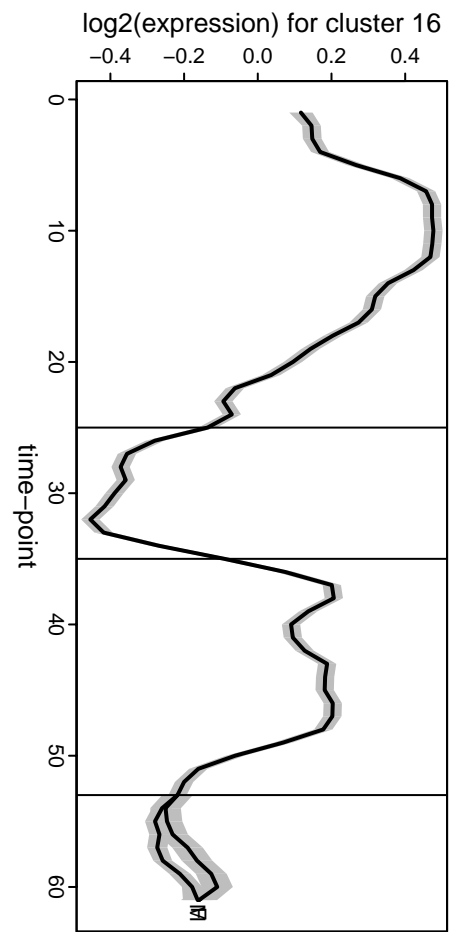

Supplement: nar_34_4_1261__1.pdf [file nar_34_4_1261__1.pdf]

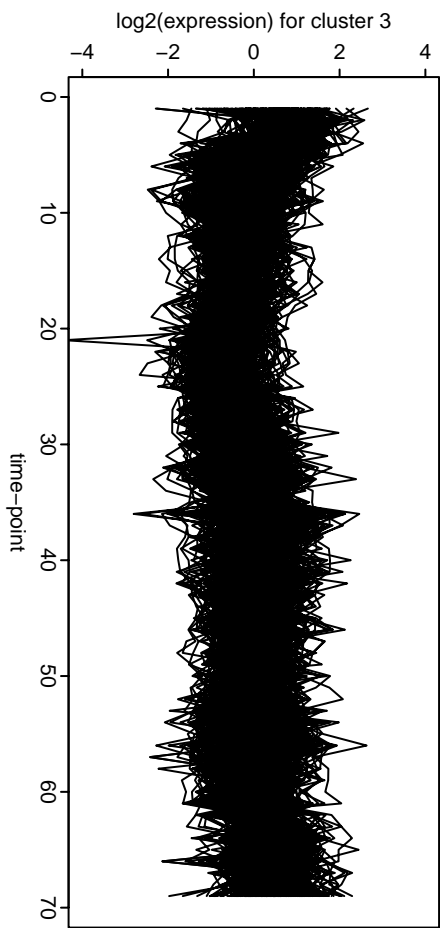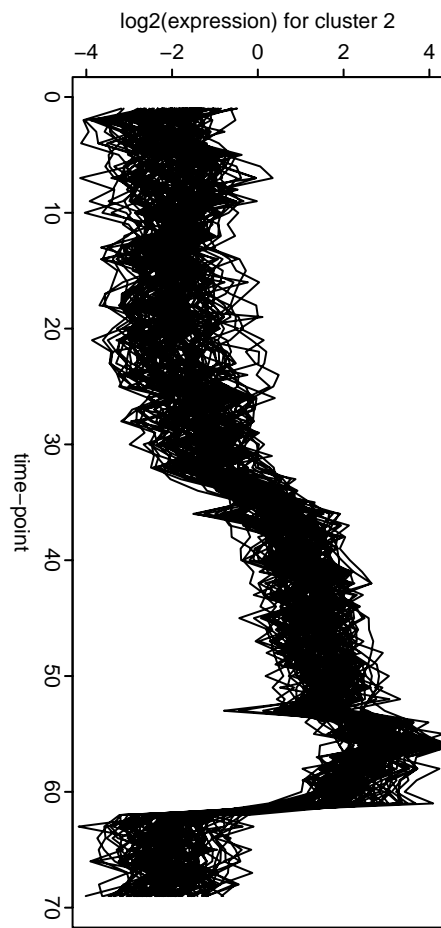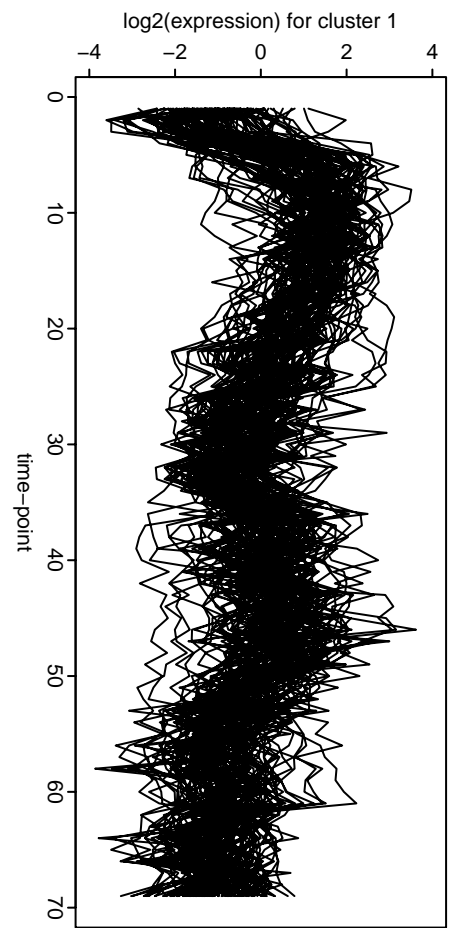

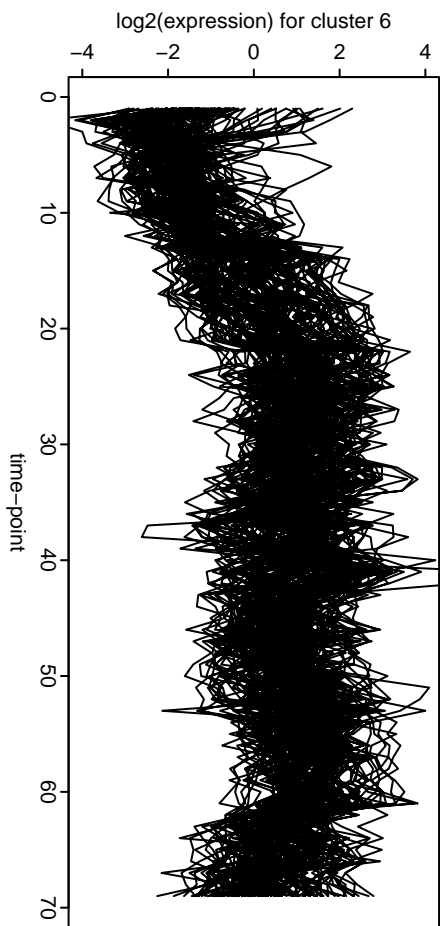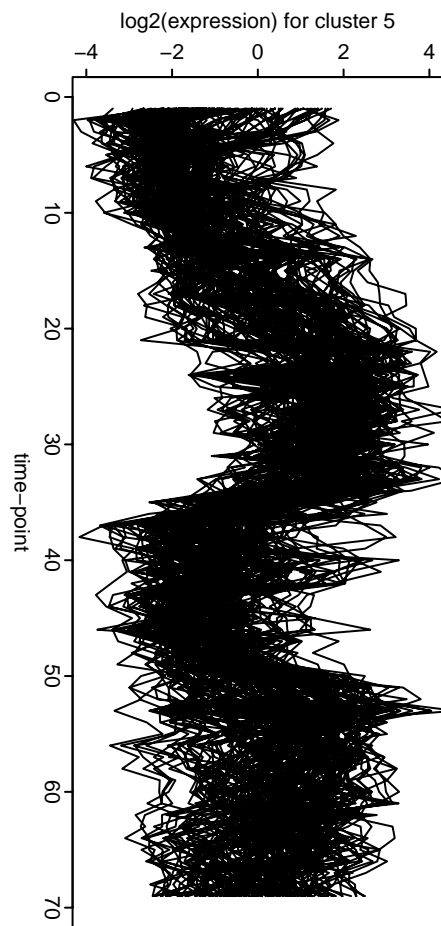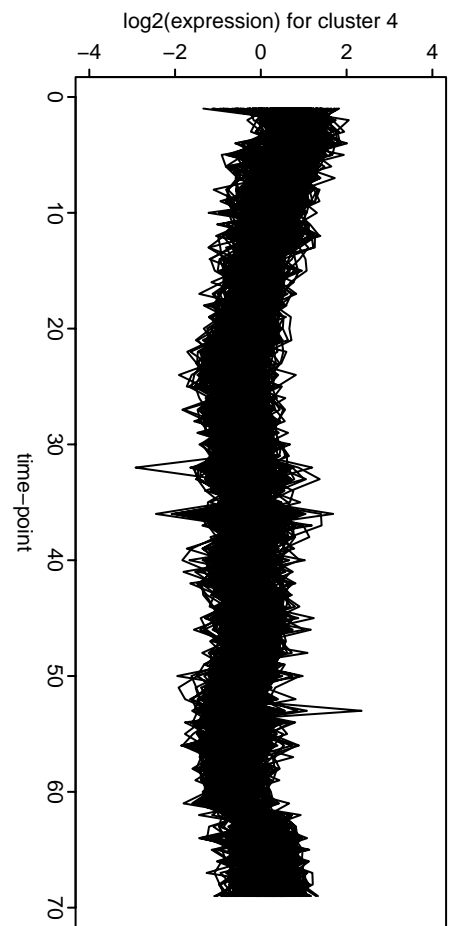

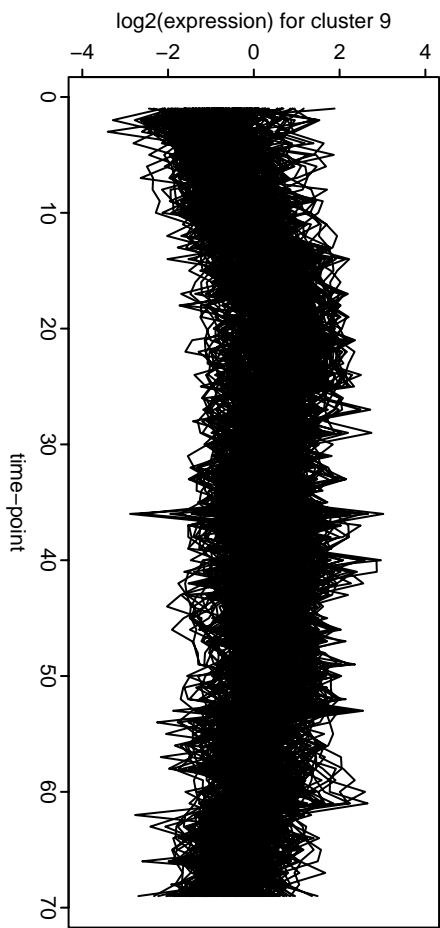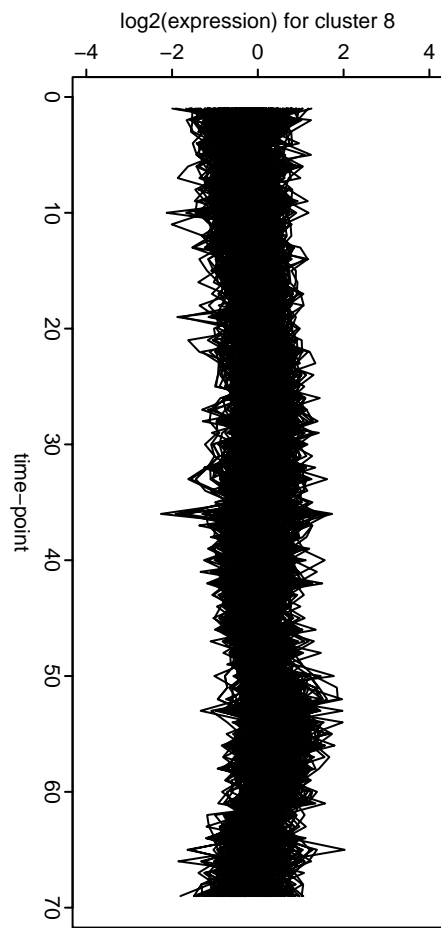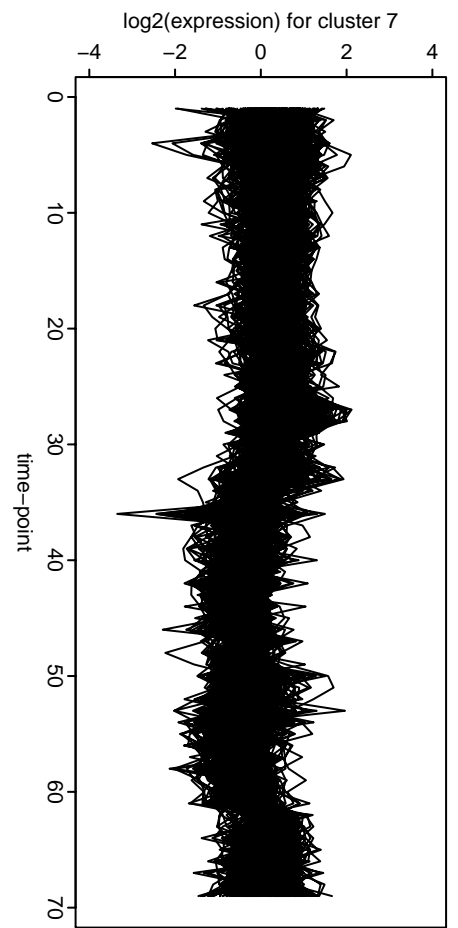

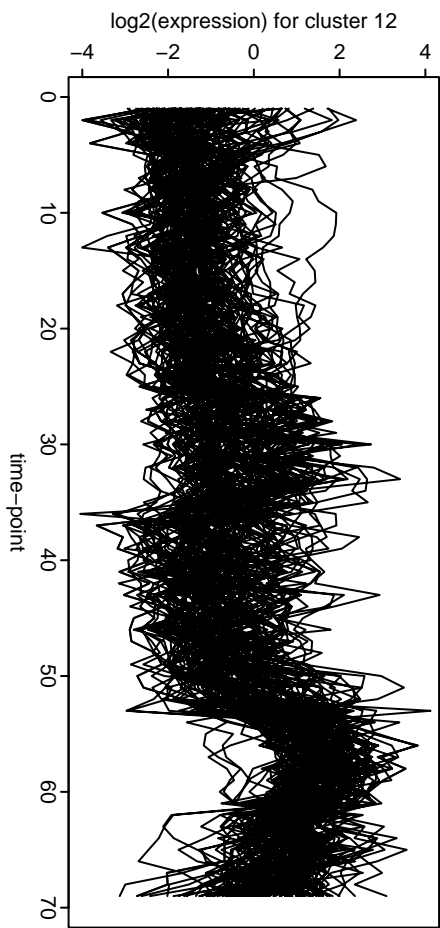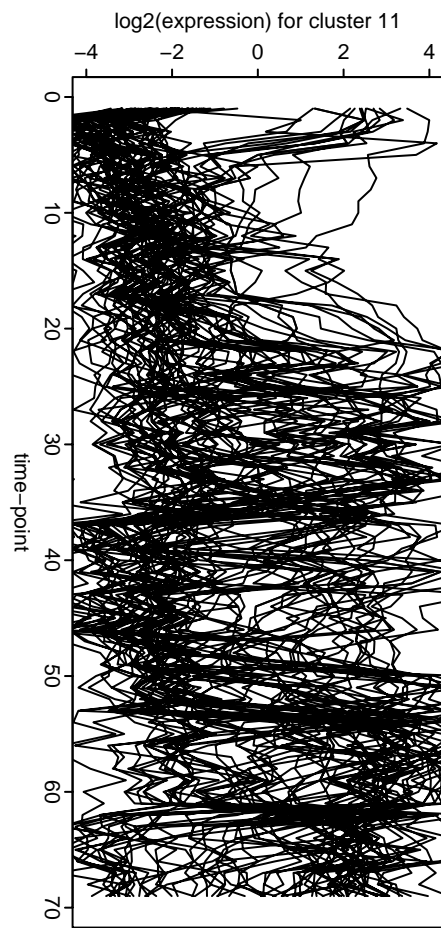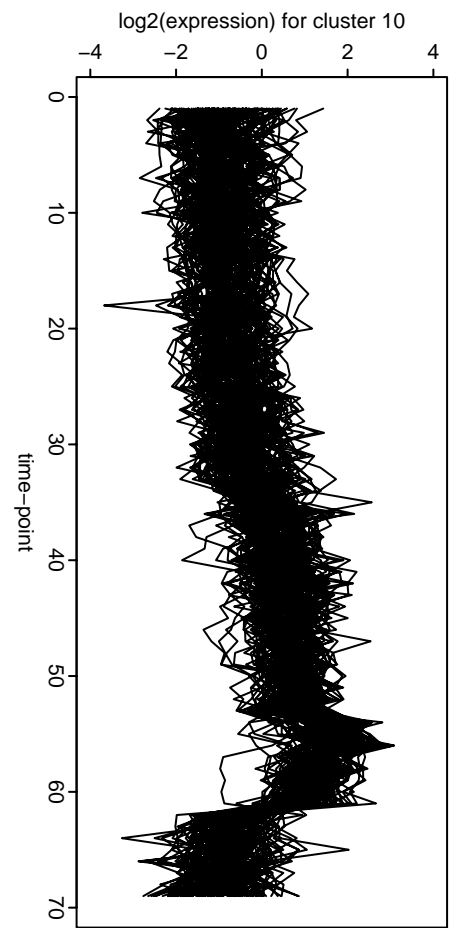

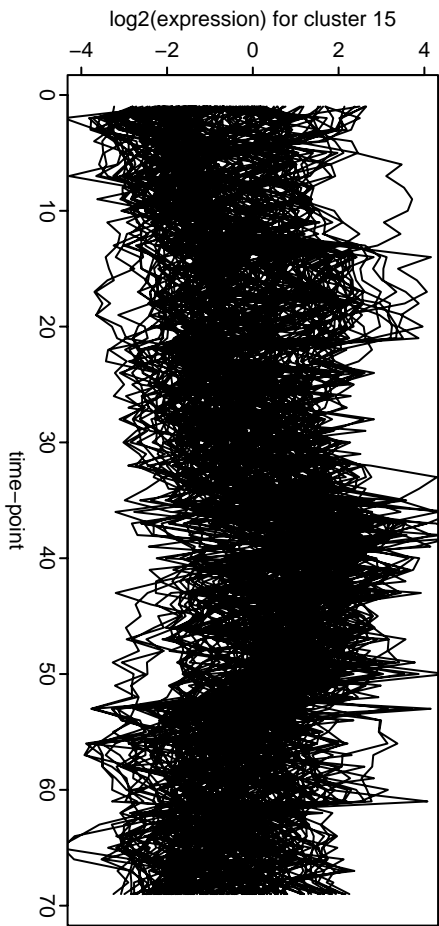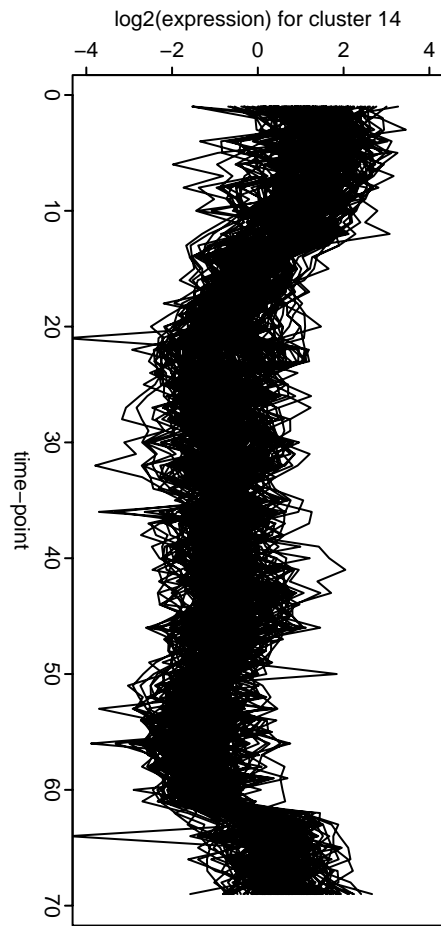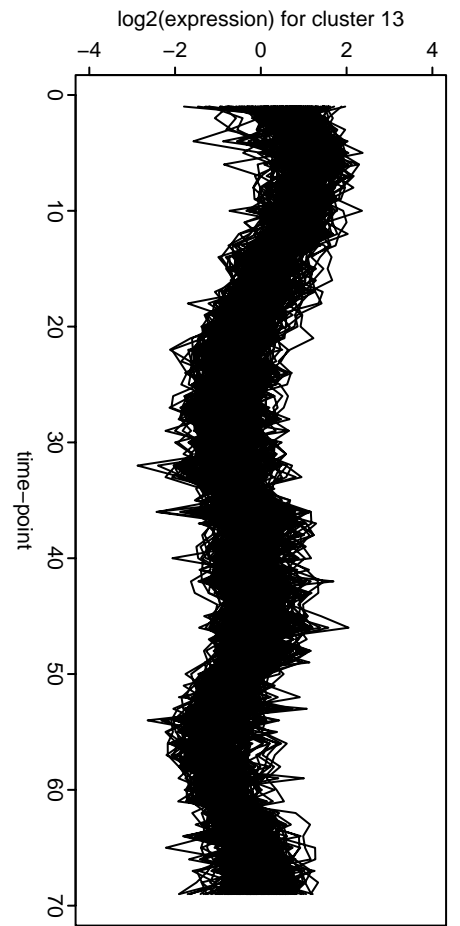

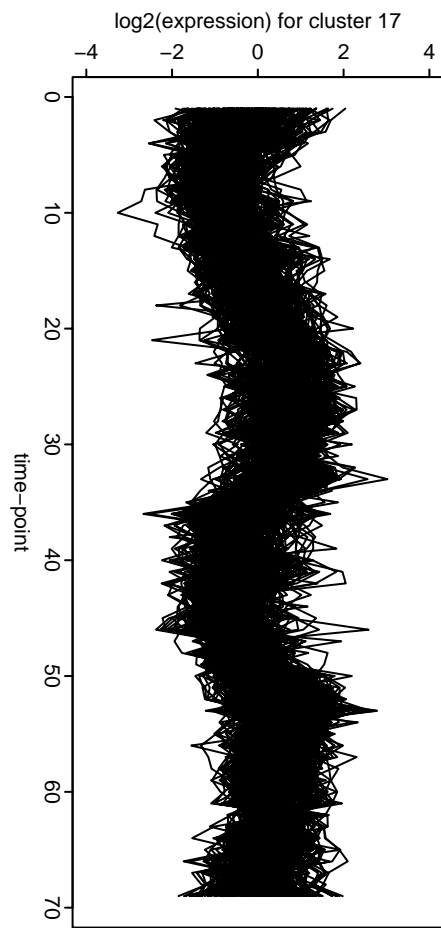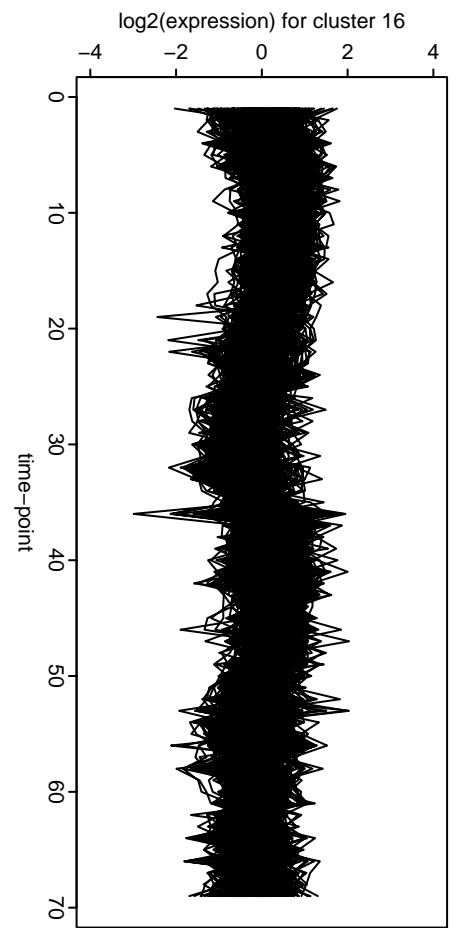

Supplement: nar_34_4_1261__2.pdf [file nar_34_4_1261__2.pdf]

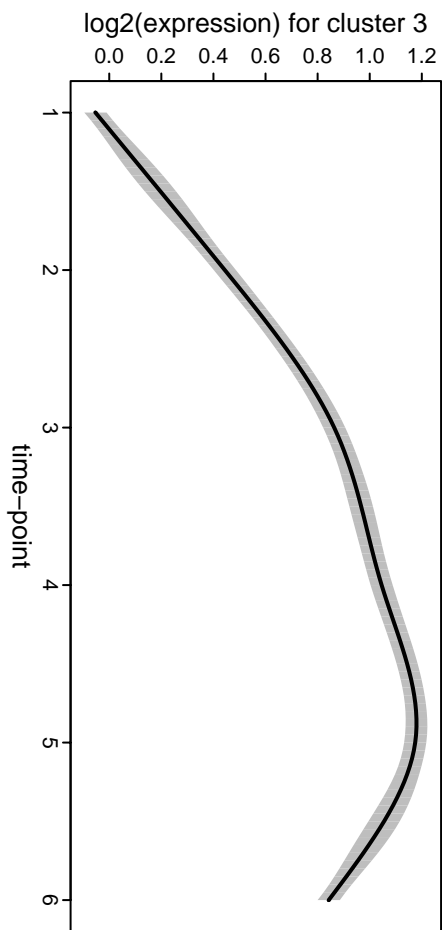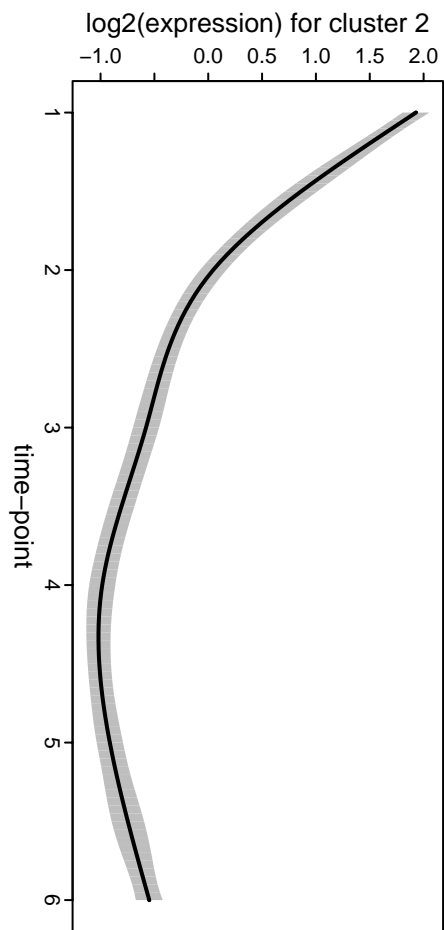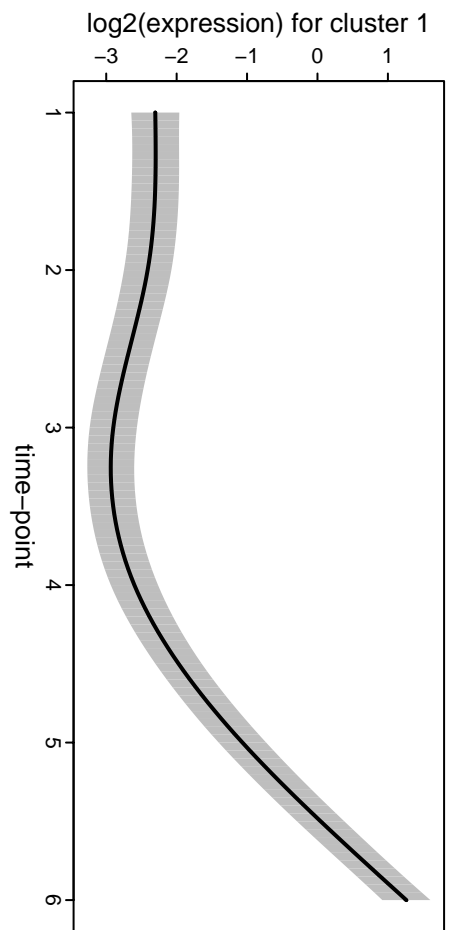

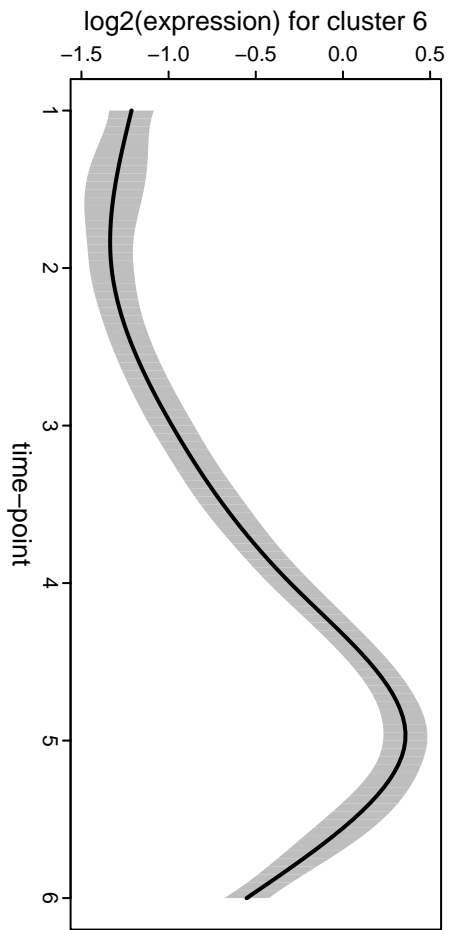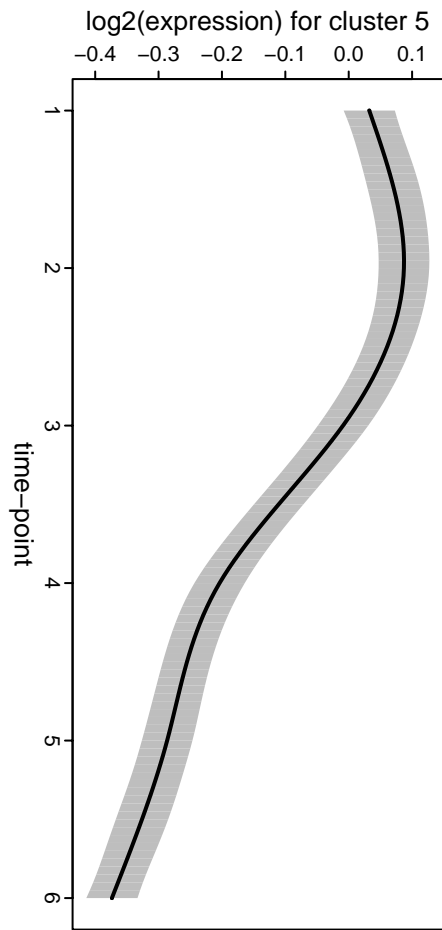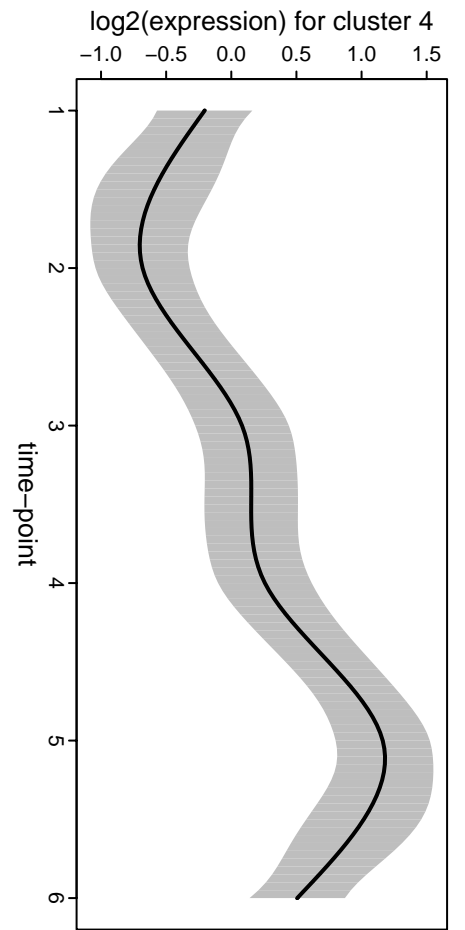

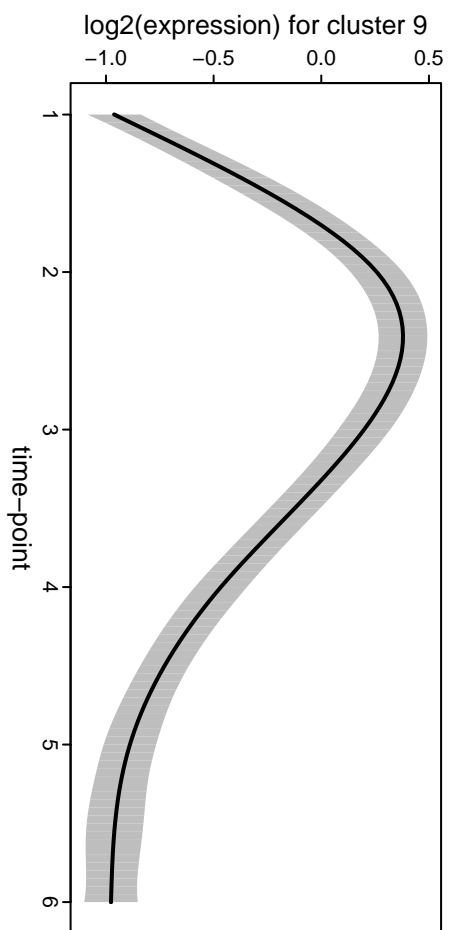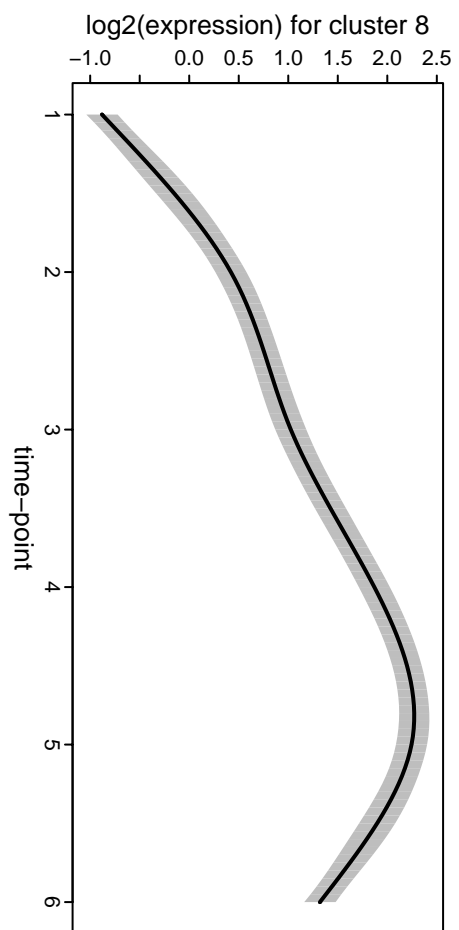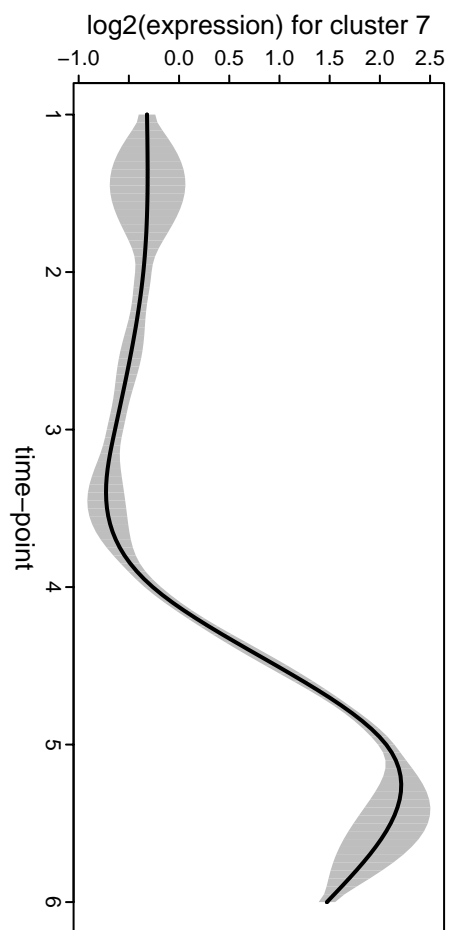

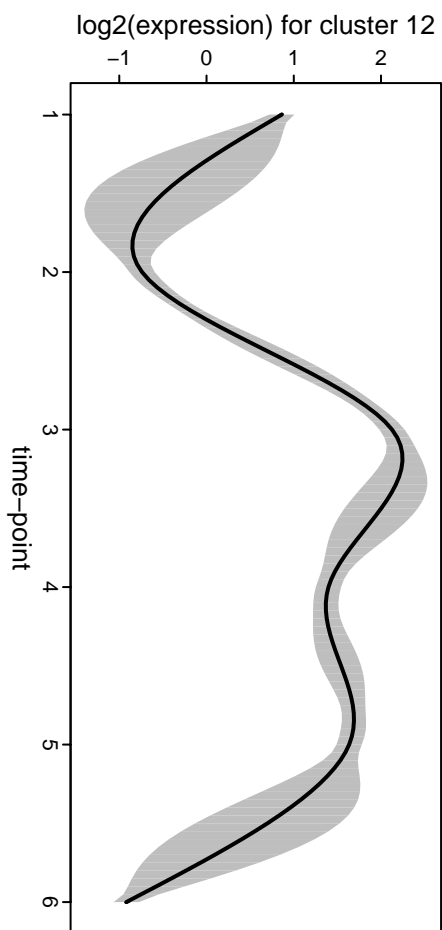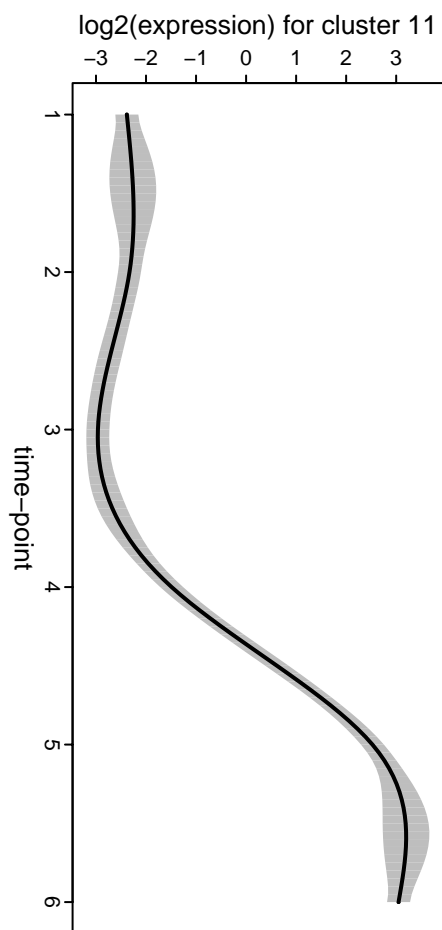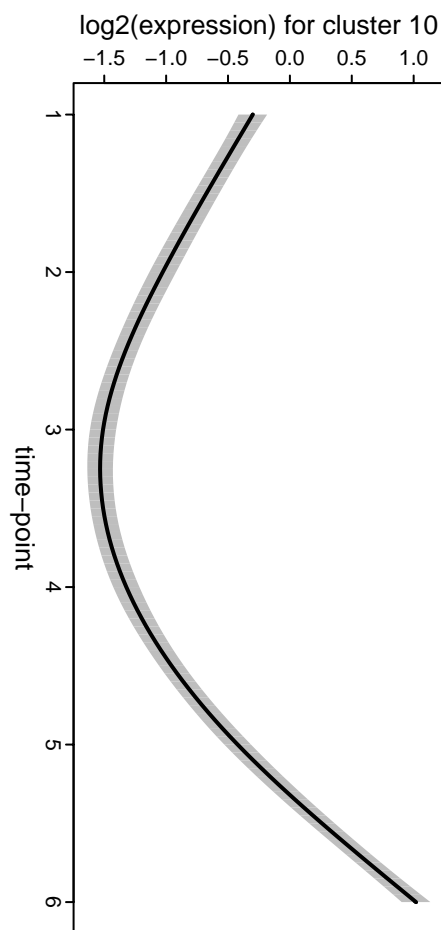

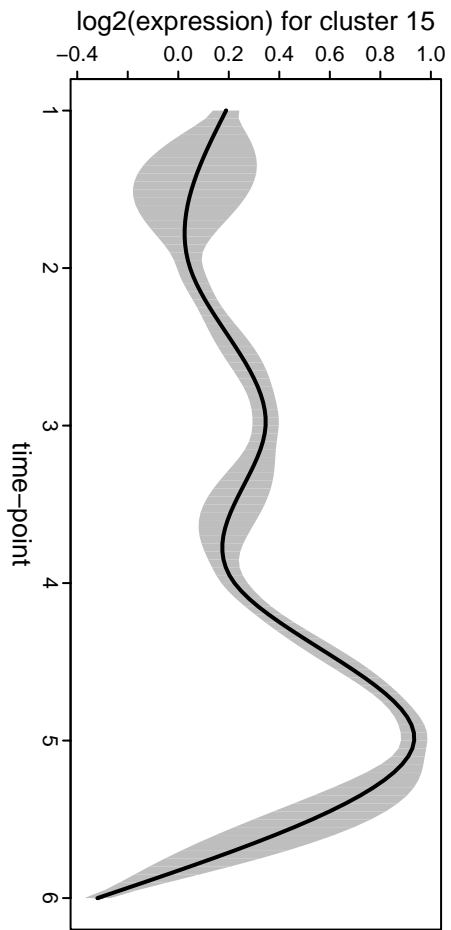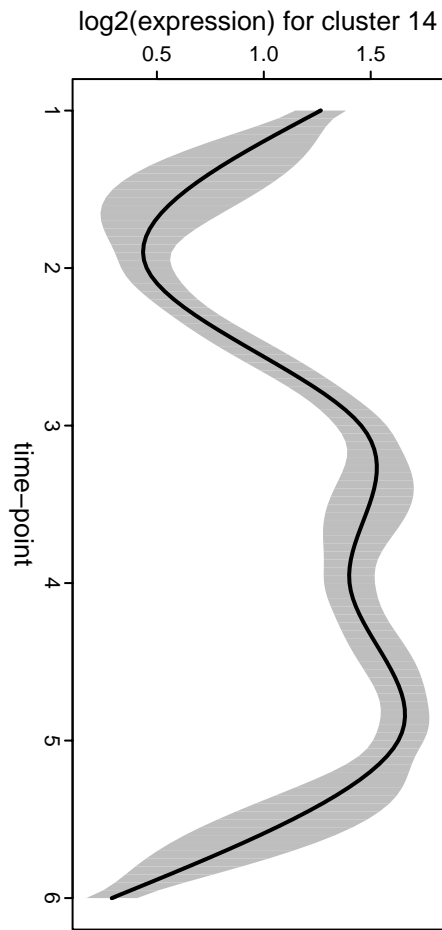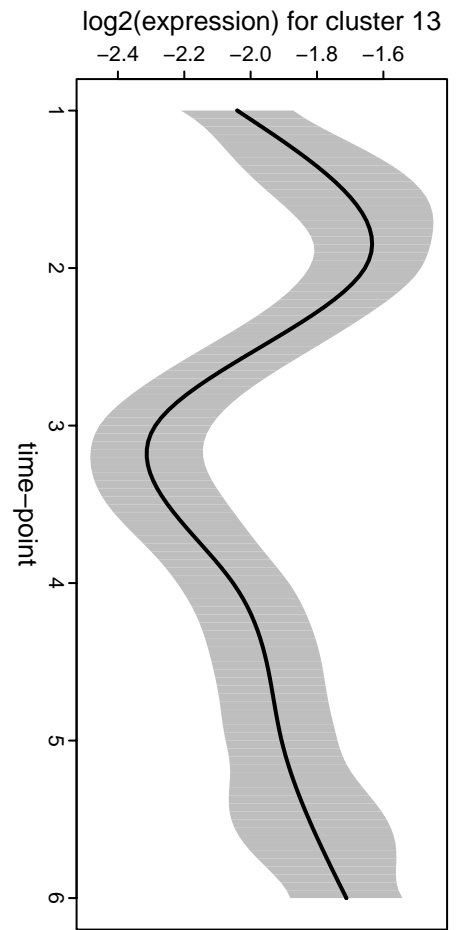

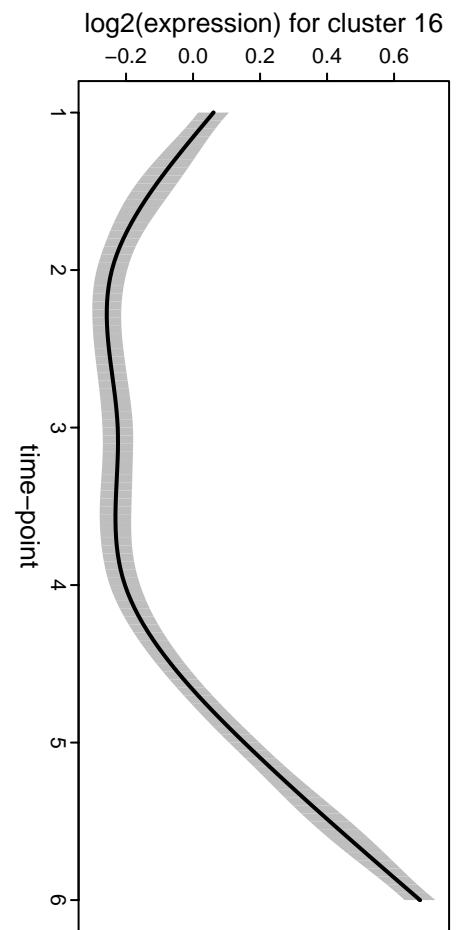

Supplement: nar_34_4_1261__3.pdf [file nar_34_4_1261__3.pdf]

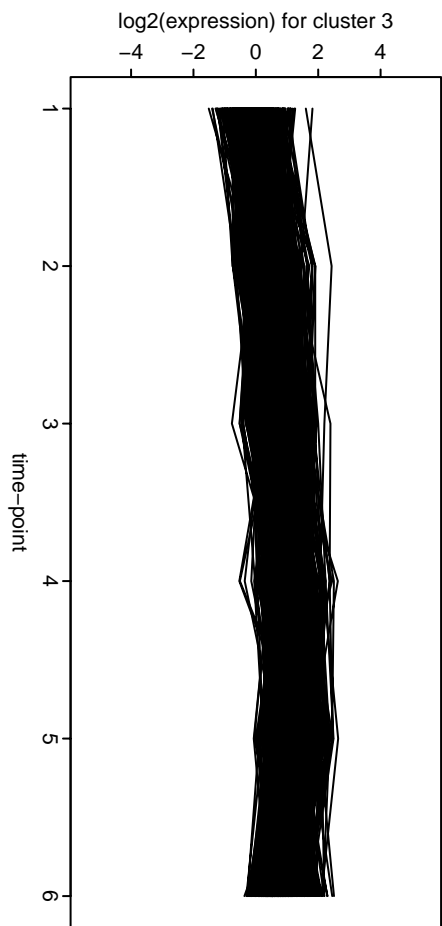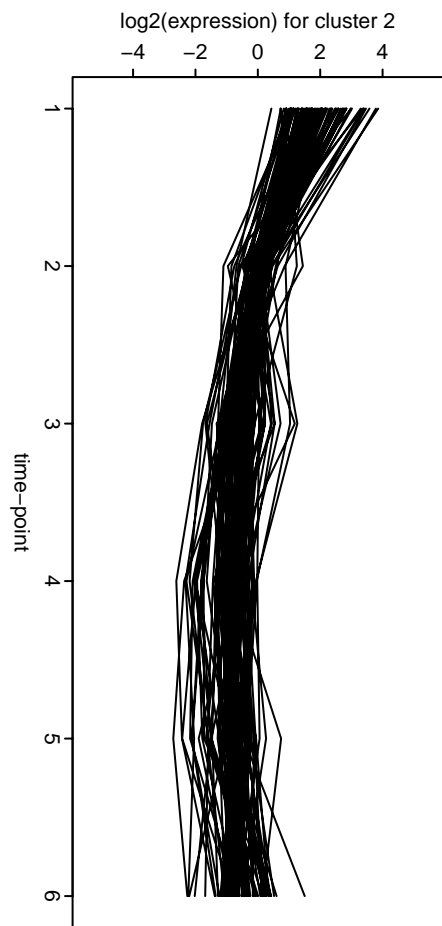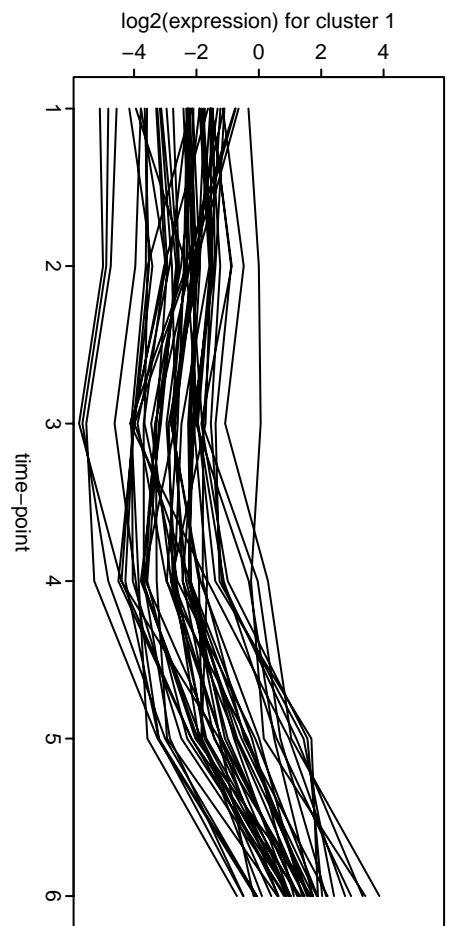

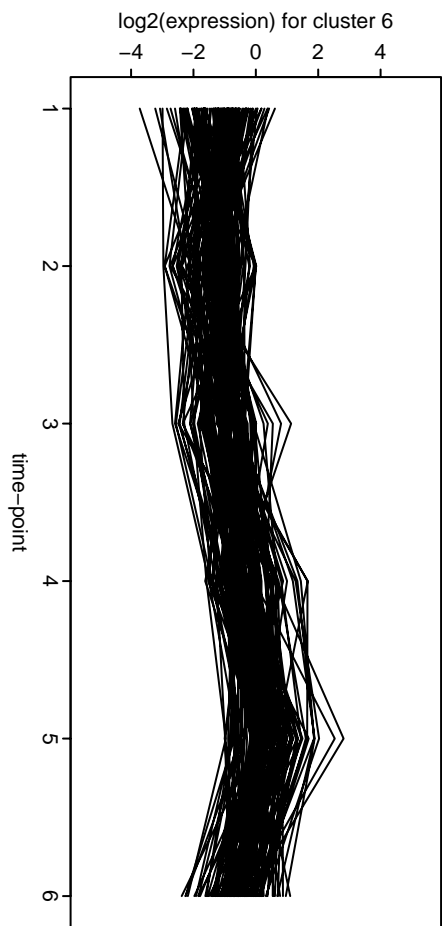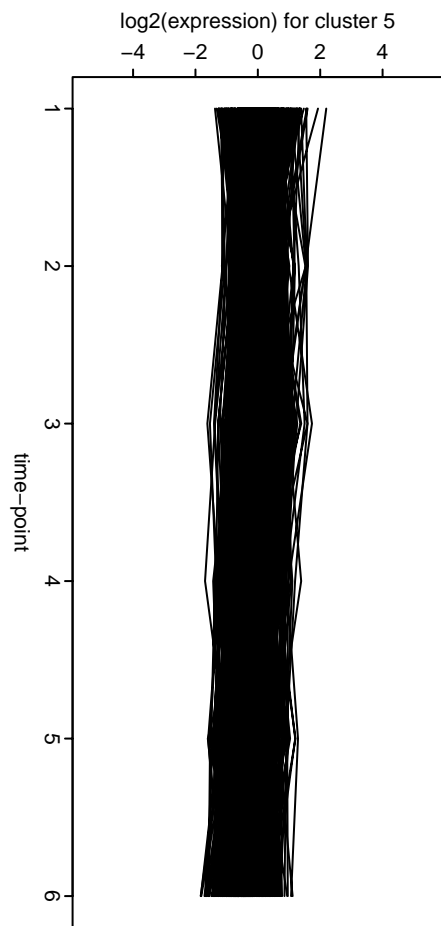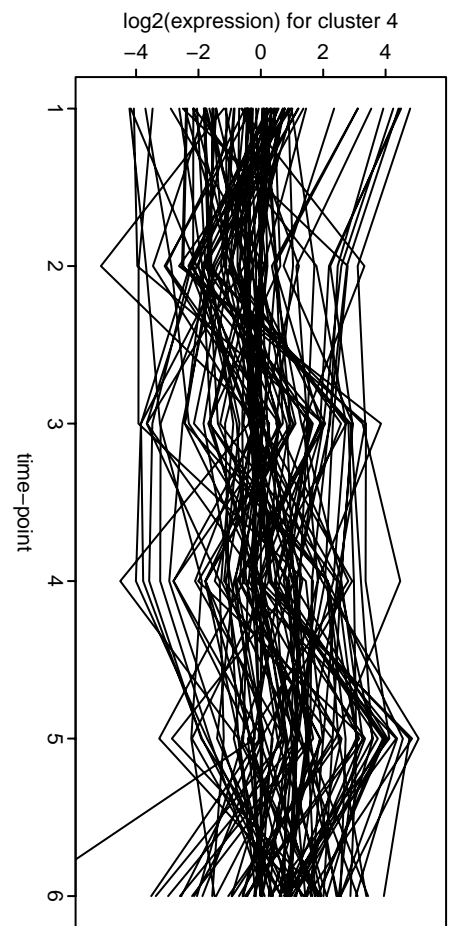

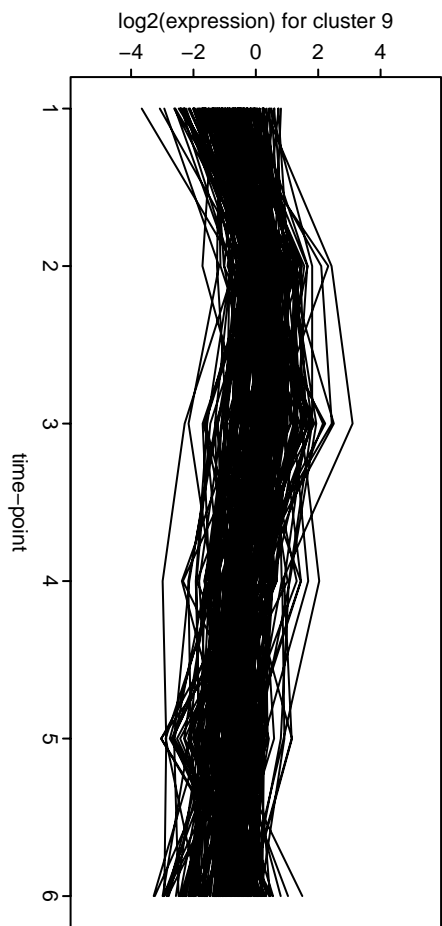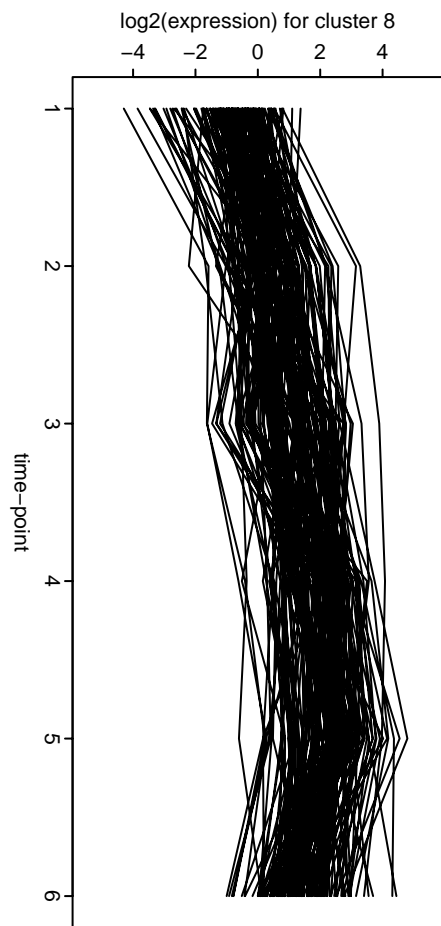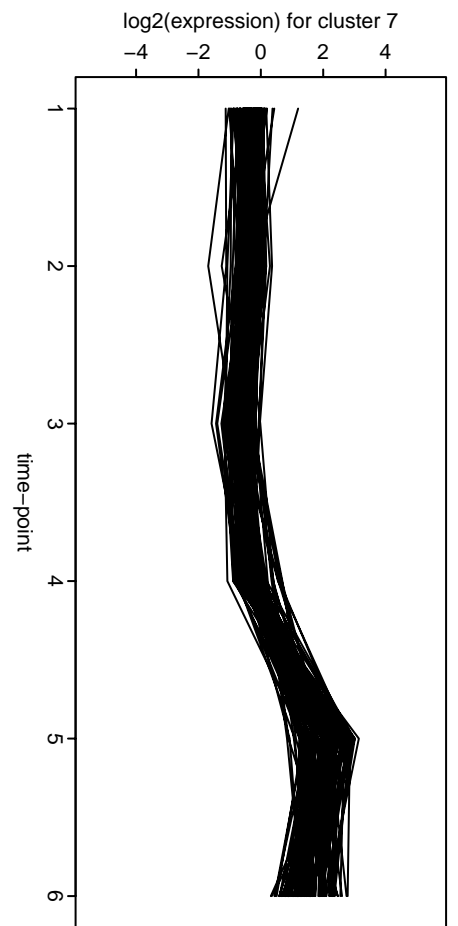

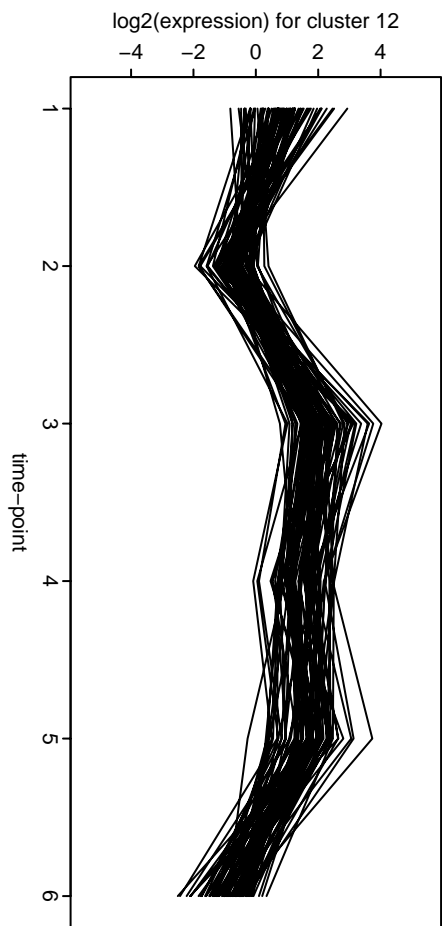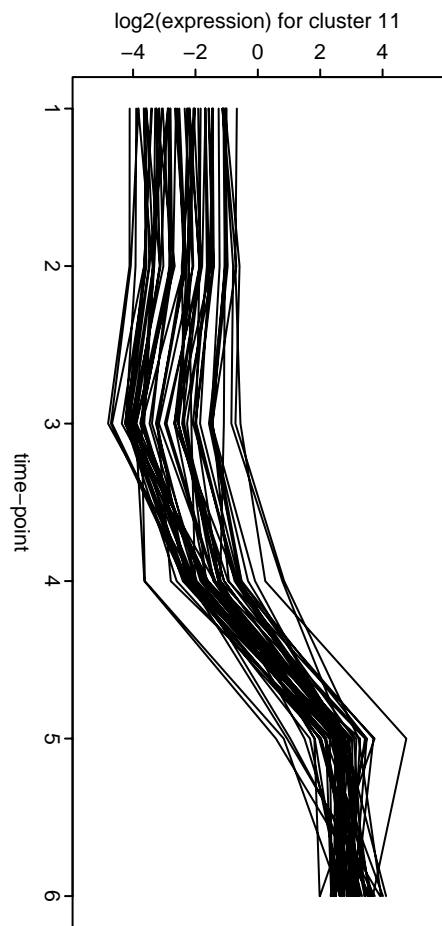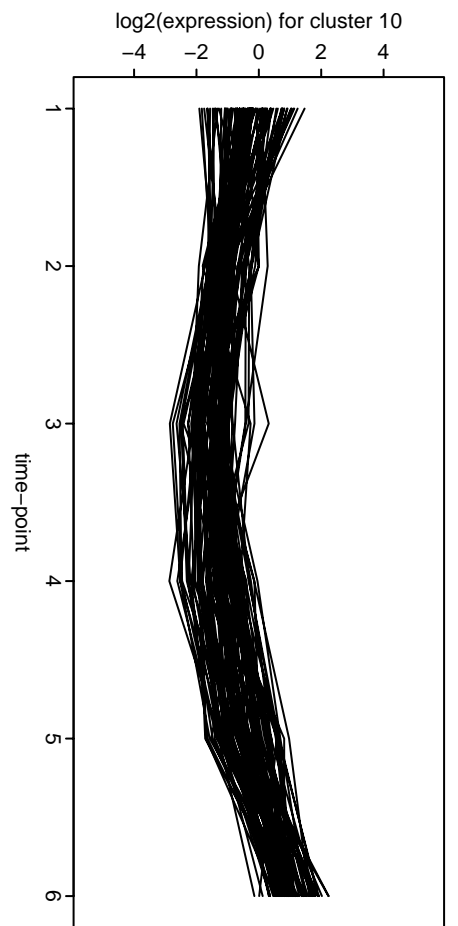

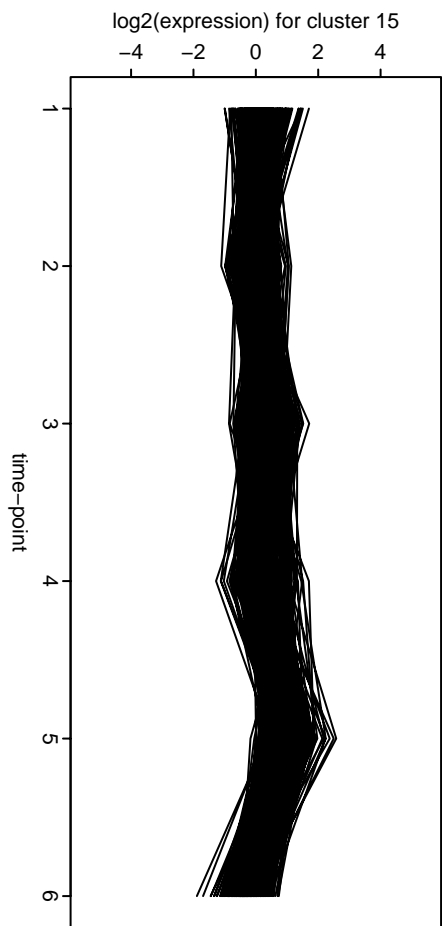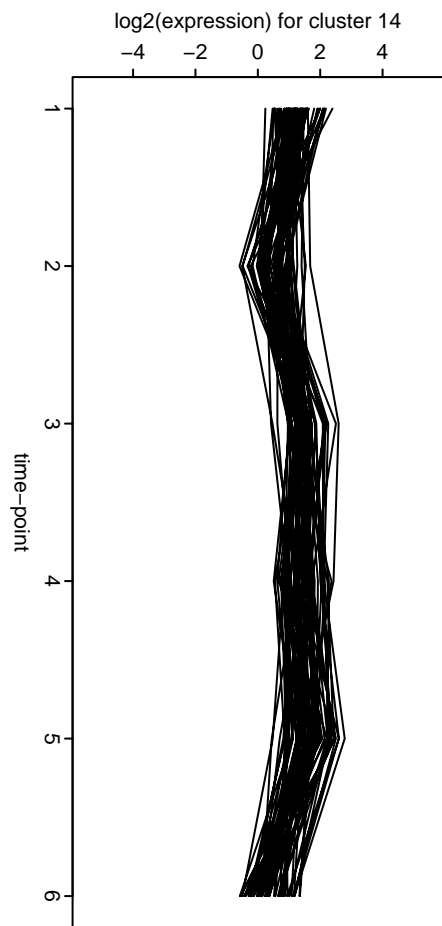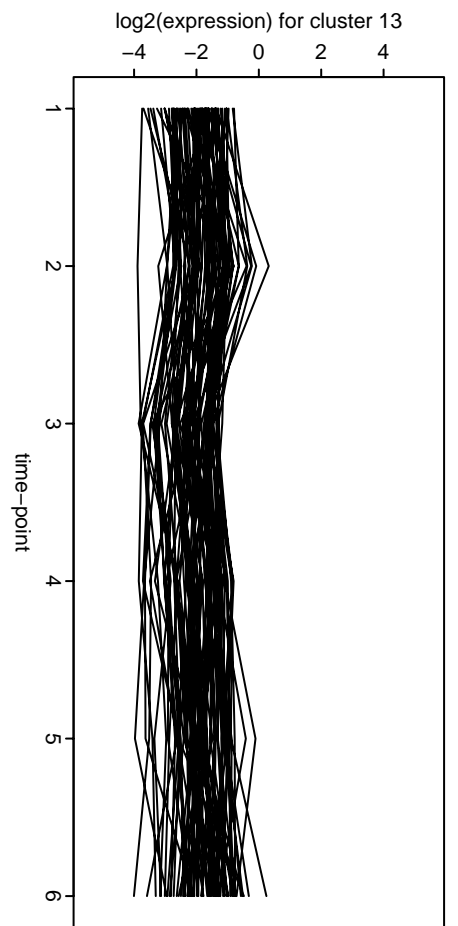

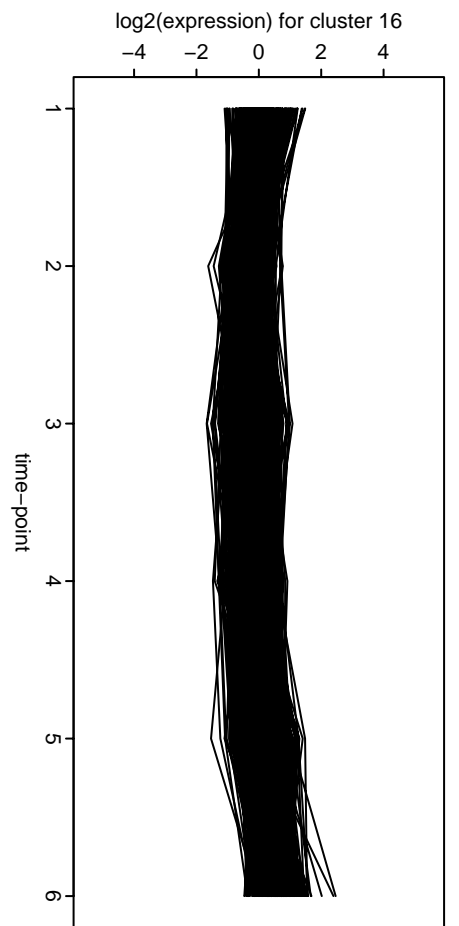

Supplement: nar_34_4_1261__4.pdf [file nar_34_4_1261__4.pdf]
